# Supplementary material for: DNA origami deposition on native and passivated molybdenum disulfide substrates
Source: PubMed Central journal article supplement (PMC7879407; doi:10.3762/bjnano.5.58), 2014-04-22
Supplement: Beilstein_J_Nanotechnol-05-501-s001.pdf [file Beilstein_J_Nanotechnol-05-501-s001.pdf]

## **Supporting Information**

for

### **DNA origami deposition on native and passivated molybdenum disulfide substrates**

Xiaoning Zhang, Masudur Rahman, David Neff and Michael L. Norton \*

Address: Department of Chemistry, Marshall University, One John Marshall Drive, Huntington, West Virginia 25755, United States

Email: Michael L. Norton\* - norton@marshall.edu

\* Corresponding author

### **Additional experimental data**

### **Self-assembled DNA origami nanostructure formation**

The detailed procedure for the formation of DNA origami is as follows: A mixture of staple strand DNA containing the same concentration of each staple was prepared first. This pre-mix was then added into a solution of single-stranded M13mp18 phage DNA (M13) and TAE buffer containing  $\text{Mg}^{2+}$  ions, and brought to a final volume of 50  $\mu\text{L}$  with DI water. The final solution mixture contains 50 nM of each staple strand, 10 nM M13, 40 mM Tris, 20 mM sodium acetate, 1 mM EDTA, and 12.5 mM magnesium acetate ( $1 \times$  TAE buffer with  $\text{Mg}^{2+}$ ). The solution was then heated to 90 °C in a thermal cycler (MWG AG Biotech Primus 96 Plus) and allowed to cool slowly (for approximately 13 h) to 20 °C. The produced solution contained self-assembled DNA origami suspended in TAE buffer.

### **Study of the effect of methanol on the preservation of DNA origami structures**

In order to evaluate the possibility that the passivation layer could result from an impurity in the solvent, methanol, a control experiment was conducted. Maintaining the same experimental conditions for this control experiment as for the chemical modification protocol, pristine  $\text{MoS}_2$  was first dipped into pure methanol for 5 min, and then a dialyzed DNA Origami solution was applied to the treated  $\text{MoS}_2$  surface. AFM imaging of this  $\text{MoS}_2$  surface after the deposition of DNA origami (Figure S1b) indicated that the DNA origami constructs on the  $\text{MoS}_2$  surface pre-treated with methanol had lost their folded structure. This result further supports the suggestion that the preservation of the DNA origami folded structure is due to the 1-pyrenemethylamine or pyrene coatings.

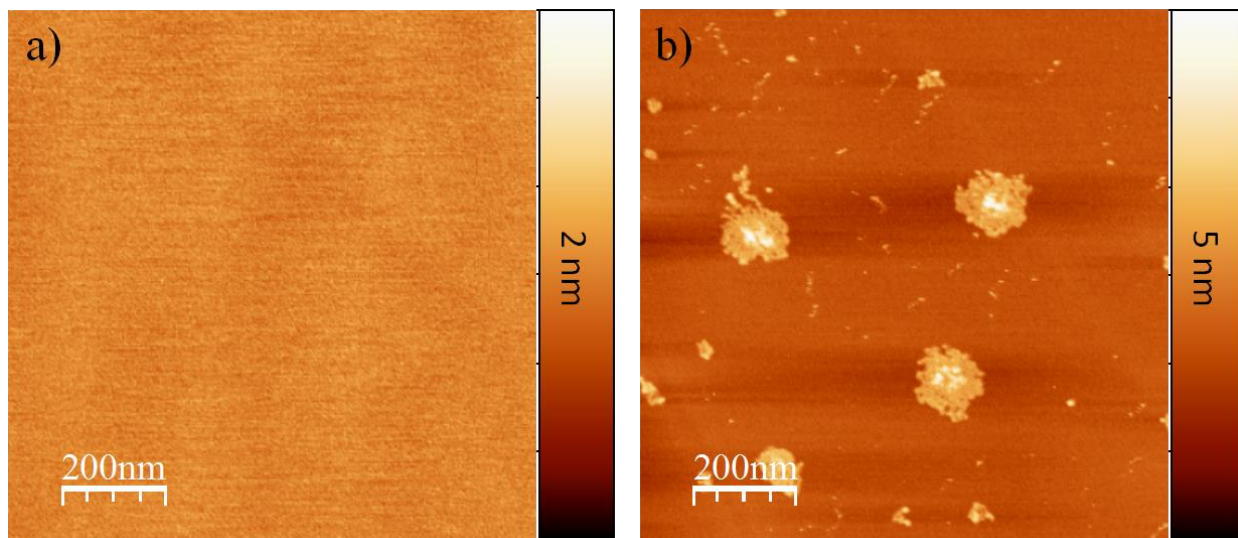

**Figure S1:** AFM image of (a) the basal plane of MoS<sub>2</sub> after exposure to methanol. (b) Cross-shaped DNA Origami adsorbed on a methanol pre-treated MoS<sub>2</sub> surface.

### **Morphology of DNA origami on 1-pyrenemethylamine passivated MoS<sub>2</sub> after 120 hours**

Figure S2 presents an AFM image of DNA Origami deposited on the 1-pyrenemethylamine modified MoS<sub>2</sub> surface recorded at 120 hours after deposition, demonstrating that the cross-like origami structures persist for significant amounts of time on this surface.

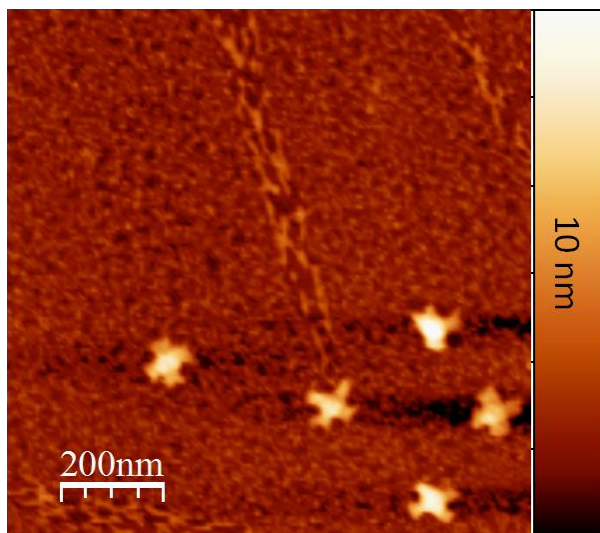

**Figure S2:** AFM image of DNA Origami adsorbed on 1-pyrenemethylamine passivated MoS<sub>2</sub> surface after 120 h under ambient atmospheric conditions.
